# Supplementary material for: Ecotoxicity of disinfectant benzalkonium chloride and its mixture with antineoplastic drug 5-fluorouracil towards alga Pseudokirchneriella subcapitata
Source: PeerJ. 2018 Jun 18;6:e4986. doi: 10.7717/peerj.4986 (PMC6011824; doi:10.7717/peerj.4986)
Supplement: Supplemental Information 1 — Table 1, growth rates of P. subcapitata with BAC (all experiments); Table 2, growth rates of P. subcapitata with mixture BAC+5-FU (all experiments); Table 3, percentage of inhibition rates (%) of P. subcapitata with BAC, Table 4, percentage of inhibition rates (%) of P. subcapitata with mixture BAC+5-FU. [file peerj-06-4986-s001.xlsx]

## Sheet: growth BAC
	Pseudokirchneriella subspicata + BAC (1)
		number of cells/ml			SD	average
	day 0	a	b	c
	starting concentration					50000
	day 1
	control	139300	123320	174120	25975.7	145580
	0.0075	122960	143840	203940	42043.1	156913
	0.0225	139440	103320	72460	33524.4	105073
	0.0675	29080	44020	45180	8979.23	39426.7
	0.2025	65140	26920	16780	25502.5	36280
	1.95	5320	780	2600	2284.82	2900
	day 2
	control	977060	1188020	1547980	288682	1.23769e+06
	0.0075	1065040	1205760	2166360	599369	1.47905e+06
	0.0225	1001460	968580	970460	18464.5	980167
	0.0675	327880	654280	502980	163345	495047
	0.2025	96160	84500	36100	31847.9	72253.3
	1.95	940	880	2820	1103.15	1546.67	growth rate (day-1)
	day 3						growth rate			average	SD	KV (%)	percent of inhibition			average % I
	control	2209020	1657280	1891140	224775	2050080	1.26276	1.16697	1.21097	1.21487	0.0677341	0.0557544	0	0	0	0
	0.0075	1749120	1984380	1958460	128998	1897320	1.18495	1.22701	1.22263	1.21153	0.0231249	0.0190873	0.0616206	-0.051452	-0.00962826	0.000180114
	0.0225	4776840	4500420	4046660	368662	4.44131e+06	1.51984	1.49997	1.46454	1.49478	0.0280102	0.0187387	-0.203583	-0.285352	-0.209395	-0.232777
	0.0675	2531400	3659020	3453360	600532	3.21459e+06	1.30817	1.43098	1.41169	1.38361	0.0660441	0.0477331	-0.0359592	-0.226232	-0.165753	-0.142648
	0.2025	250280	131320	62220	95125.2	147940	0.536852	0.321871	0.0728845	0.310536	0.232192	0.747712	0.574858	0.724182	0.939813	0.746284
	1.95	36040	8620	3900	3337.54	6260	-0.109131	-0.585979	-0.850349	-0.515153	0.37565	-0.729201	1.08642	1.50214	1.7022	1.43025
	Pseudokirchneriella subspicata + BAC (2)
		number of cells/ml			SD	average
	day 0	a	b	c
	starting concentration					50000
	day 1
	control	122400	237640	233940	2616.3	235790
	0.0075	286640	358220	343220	37749.2	329360
	0.0225	365920	183080	390100	17097.8	378010
	0.0675	202460	156520	155080	26948.8	171353
	0.2025	60540	58160	208220	1682.91	59350
	1.95	73900	55200	26820	23705.3	51973.3
	day 2
	control	422620	1525460	1223520	569922	1057200
	0.0075	2436600	2340820	2821280	254295	2532900
	0.0225	2279580	1917060	1832340	237565	2009660
	0.0675	1123420	820060	1816780	510918	1253420
	0.2025	601020	446400	1836720	761999	961380
	1.95	169200	61220	13960	79574.5	81460	growth rate (day-1)
	day 3						growth rate			average	SD	KV (%)	percent of inhibition			average % I
	control	1837800	1768900	1880700	56401.6	1.82913e+06	1.20143	1.1887	1.20913	1.19507	0.00900649	0.0075364	0	0	0	0
	0.0075	2501920	2118120	2572380	244479	2.39747e+06	1.30426	1.24875	1.31352	1.28885	0.0350283	0.027178	-0.0855892	-0.0505234	-0.08634	-0.0741508
	0.0225	2295240	1833740	2330540	277200	2.15317e+06	1.27552	1.2007	1.28061	1.25228	0.0447422	0.0357287	-0.0616675	-0.010095	-0.0591215	-0.043628
	0.0675	1809720	2124900	1914360	160528	1949660	1.1963	1.24982	1.21504	1.22039	0.0271566	0.0222525	0.00427186	-0.0514196	-0.0048904	-0.017346
	0.2025	1238160	1759120	3036900	925526	2.01139e+06	1.06979	1.18685	1.36886	1.2085	0.150706	0.124705	0.109575	0.0015547	-0.132105	-0.00699151
	1.95	24320	47020	20640	14287.2	30660	-0.240241	-0.0204833	-0.294931	-0.185218	0.145262	-0.784273	1.19996	1.01723	1.24392	1.1537
	Pseudokirchneriella subspicata + BAC (3)
		number of cells/ml			SD	average
	day 0	a	b	c
	starting concentration					50000
	day 1
	control	217520	218220	193740	13935.9	209827
	0.0075	185120	184460	102980	47234.2	157520
	0.0225	122120	122880	78420	25452.4	107807
	0.0675	31860	32940	66420	19648.9	43740
	0.2025	50640	23720	26480	14810	33613.3
	1.95	11280	10500	15040	2427.54	12273.3
	day 2
	control	1111600	839760	368340	376069	773233
	0.0075	833840	780000	200560	351116	604800
	0.0225	669980	652960	280040	220383	534327
	0.0675	301340	52100	301500	143945	218313
	0.2025	54760	33900	50020	10935.1	46226.7
	1.95	10240	17040	11380	3641.78	12886.7	growth rate (day-1)
	day 3						growth rate			average	SD	KV (%)	percent of inhibition			average % I
	control	3033280	2885280	1963340	579748	2627300	1.36846	1.35178	1.22346	1.31457	0.0793411	0.0603553	0	0	0	0
	0.0075	2958220	2527640	1590480	699331	2358780	1.36011	1.30767	1.15326	1.27368	0.107534	0.0844277	0.00610341	0.0326324	0.0573813	0.032039
	0.0225	3160940	3140040	2081700	617155	2.79423e+06	1.3822	1.37999	1.24297	1.33505	0.0797528	0.0597375	-0.0100417	-0.0208647	-0.0159487	-0.0156183
	0.0675	2256620	307340	1713500	1.00598e+06	1425820	1.26987	0.605311	1.17809	1.01776	0.360124	0.353841	0.0720461	0.552214	0.0370831	0.220448
	0.2025	290160	140420	169220	79454.4	199933	0.586136	0.344205	0.406392	0.445578	0.125636	0.281961	0.571681	0.74537	0.667834	0.661628
	1.95	10180	3560	7580	3335.29	7106.67	-0.530533	-0.880754	-0.628837	-0.680041	0.180638	-0.265629	1.38769	1.65155	1.51398	1.51774
	Pseudokirchneriella subspicata + BAC (4)
		number of cells/ml			SD	average
	day 0	a	b	c
	starting concentration					50000
	day 1
	control	221240	178440	181080	23984.8	193587
	0.0075	158760	118400	173580	28558.1	150247
	0.0225	57940	104460	115300	30473.4	92566.7
	0.0675	16900	42380	52840	18485.7	37373.3
	0.2025	20300	15800	15720	2621.48	17273.3
	1.95	5780	21720	1860	10518.8	9786.67
	day 2
	control	1075200	277060	480480	414749	610913
	0.0075	672360	282440	829980	281863	594927
	0.0225	179640	417960	400040	132724	332547
	0.0675	219120	238960	160240	40941.7	206107
	0.2025	37760	48380	32740	7985.34	39626.7
	1.95	12720	17920	9500	4248.62	13380	growth rate (day-1)
	day 3						growth rate			average	SD	KV (%)	percent of inhibition			average % I
	control	1301160	1559360	2818440	182575	1430260	1.08633	1.14667	1.34397	1.1165	0.0426667	0.0382147	0	0	0	0
	0.0075	3846500	2684260	4455660	899976	3662140	1.44763	1.32771	1.49664	1.42399	0.0869072	0.0610306	-0.33259	-0.157886	-0.113592	-0.201356
	0.0225	1266900	3482080	2623300	1.11687e+06	2.45743e+06	1.07744	1.41445	1.32006	1.27065	0.173857	0.136825	0.00818757	-0.233533	0.0177956	-0.0691832
	0.0675	1397880	1798620	1128580	337162	1.44169e+06	1.11023	1.19425	1.0389	1.11446	0.0777629	0.0697763	-0.0220009	-0.0414953	0.226995	0.0544995
	0.2025	135740	224960	274140	70158.7	211613	0.332906	0.5013	0.567205	0.467137	0.120828	0.258656	0.69355	0.562821	0.577963	0.611445
	1.95	7500	10280	3460	3429.34	7080	-0.632373	-0.527274	-0.890251	-0.6833	0.186771	-0.273336	1.58212	1.45983	1.6624	1.56812

## Sheet: growth BAC+FU
	Pseudokirchneriella subspicata + BAC + 5-FU(1)
		number of cells/ml			SD	average
	day 0	a	b	c
	starting concentration					50000
	day 1
	control	196380	206600	198200	5451.62	200393
	EC 5	112760	63960	69800	26649.3	82173.3
	EC 10	48040	86300	56060	20176.7	63466.7
	EC 20	7620	32400	29880	13637.6	23300
	EC 50	49780	31080	29160	11391.2	36673.3
	EC 90	21280	54220	26120	17786.1	33873.3
	day 2
	control	686900	1223620	747280	293999	885933
	EC 5	619500	585180	121180	278327	441953
	EC 10	285440	407780	401120	68791.1	364780
	EC 20	136940	52140	111600	43529	100227
	EC 50	16440	23480	29840	6702.88	23253.3
	EC 90	17800	13680	13180	2535.38	14886.7	growth rate (day-1)
	day 3						growth rate			average	SD	KV (%)	percent of inhibition			average % I
	control	3701680	2596340	3833100	679292	3377040	1.43484	1.31661	1.44647	1.39931	0.0718516	0.051348	0	0	0	0
	EC 5	2180760	3106580	384840	654654	2643670	1.25847	1.37642	0.680268	1.10505	0.37257	0.337152	0.12292	-0.0454246	0.529704	0.2024
	EC 10	1412620	2255780	3254940	922260	2307780	1.11373	1.26974	1.39197	1.25848	0.139463	0.110819	0.223798	0.0355982	0.037678	0.0990246
	EC 20	1373080	73700	93040	744677	513273	1.10426	0.129327	0.207002	0.480197	0.54185	1.12839	0.230393	0.901773	0.856891	0.663019
	EC 50	35520	27800	21680	6935.4	28333.3	-0.113976	-0.195662	-0.278544	-0.196061	0.082285	-0.419691	1.07943	1.14861	1.19257	1.1402
	EC 90	14540	14420	5760	5034.85	11573.3	-0.411707	-0.414469	-0.720362	-0.515512	0.17741	-0.344143	1.28694	1.3148	1.49801	1.36658
	Pseudokirchneriella subspicata + benzalkonijev klorid + 5-fluorouracil (2)
		number of cells/ml			SD	average
	day 0	a	b	c
	starting concentration					50000
	day 1
	control	186560	160200	231740	36180.2	192833
	EC 5	91680	81400	86620	5140.21	86566.7
	EC 10	15900	61420	31980	23084.4	36433.3
	EC 20	23080	16360	21940	3596.16	20460
	EC 50	9480	13220	38360	15706	20353.3
	EC 90	79440	70980	40900	20255.5	63773.3
	day 2
	control	1090020	481340	1230340	398159	933900
	EC 5	410220	445800	341880	52813.6	399300
	EC 10	69400	296320	80220	128003	148647
	EC 20	70640	76100	64180	5966.99	70306.7
	EC 50	15920	16140	18440	1395.76	16833.3
	EC 90	50920	19720	27700	16208.5	32780	growth rate (day-1)
	day 3						growth rate			average	SD	KV (%)	percent of inhibition			average % I
	control	1957920	1975080	1899960	39363.4	1944320	1.22254	1.22545	1.21252	1.22017	0.00678059	0.00555709	0	0	0	0
	EC 5	2169760	2891340	2057660	452450	2372920	1.25678	1.35248	1.2391	1.28279	0.0610017	0.0475539	-0.0280111	-0.103666	-0.0219203	-0.0511991
	EC 10	610980	2029920	700880	63568.9	655930	0.834347	1.23458	0.880105	0.983009	0.219061	0.222848	0.317529	-0.00744966	0.274154	0.194744
	EC 20	394520	540260	307660	117536	414147	0.688549	0.793342	0.605657	0.69585	0.0940553	0.135166	0.436787	0.35261	0.500498	0.429965
	EC 50	13460	88340	27600	39783.4	43133.3	-0.437434	0.189723	-0.198069	-0.148593	0.316492	-2.12993	1.35781	0.84518	1.16335	1.12211
	EC 90	19420	15820	13100	3170.19	16113.3	-0.31524	-0.383583	-0.44647	-0.381764	0.0656341	-0.171923	1.25786	1.31301	1.36822	1.31303
	Pseudokirchneriella subspicata + benzalkonijev klorid + 5-fluorouracil (3)
		number of cells/ml			SD	average
	day 0	a	b	c
	starting concentration					50000
	day 1
	control	173260	199220	213220	20276.1	195233
	EC 5	71240	182540	122540	55706.6	125440
	EC 10	58000	143100	97480	42586.9	99526.7
	EC 20	110240	45700	78140	32270.1	78026.7
	EC 50	14540	34020	25400	9761.44	24653.3
	EC 90	18380	19520	15820	1894.87	17906.7
	day 2
	control	1337240	1016940	1988600	495141	1.44759e+06
	EC 5	147260	899640	415320	381335	487407
	EC 10	296800	449200	109640	170076	285213
	EC 20	150460	65500	250100	92397.2	155353
	EC 50	34100	36560	22260	7645.56	30973.3
	EC 90	8380	14880	13040	3350.4	12100	growth rate (day-1)
	day 3						growth rate			average	SD	KV (%)	percent of inhibition			average % I
	control	4986180	5604880	5878620	457197	5.48989e+06	1.53413	1.57312	1.58902	1.56543	0.0282402	0.01804	0	0	0	0
	EC 5	322220	*	2304700	2.53176e+06	2658480	0.621071	*	1.27689	0.948982	0.463737	0.488668	0.595165	*	0.196426	0.395796
	EC 10	2608040	4452620	200480	2.13227e+06	2420380	1.31811	1.49641	0.462897	1.09247	0.552468	0.505704	0.140811	0.048766	0.70869	0.299422
	EC 20	1019360	521840	2088000	800247	1.20973e+06	1.00497	0.781779	1.24398	1.01024	0.231145	0.228802	0.344927	0.50304	0.217139	0.355036
	EC 50	73160	42520	31740	21488.9	49140	0.126875	-0.0540162	-0.151482	-0.0262075	0.141247	-5.38955	0.917298	1.03434	1.09533	1.01566
	EC 90	5700	4380	8500	2103.84	6193.33	-0.723852	-0.811658	-0.590652	-0.708721	0.111277	-0.157011	1.47183	1.51595	1.37171	1.45316

## Sheet: %inh. BAC
			% of growth inhibition af all the paralels from all the experiments
	BAC	concentration (mg/L)	a	b	c	d	e	f	g	h	i	j	k	l
		(control) 0	0	0	0	0	0	0	0	0	0	0	0	0
		0.0075	6	-5	-1	-9	-5	-9	1	3	6	-33	-16	-11
		0.0225	-20	-29	-21	-6	-1	-6	-1	-2	-2	1	-23	2
		0.0675	-4	-23	-17	0	-5	0	7	55	4	-2	-4	23
		0.2025	57	72	94	11	0	-13	57	75	67	69	56	58
		1.95	109	150	170	120	102	124	139	165	151	158	146	166

## Sheet: %inh. BAC+FU
			% of growth inhibition af all the paralels from all the experiments
	BAC+FU	concentration/effect	a	b	c	d	e	f	g	h	i	j	k	l
		control	0	0	0	0	0	0	0	0	0	0	0	0
		EC 5/3	12	-5	53	-3	-10	-2	60	*	20	14	27	-34
		EC 10/3	22	4	4	32	-1	27	14	5	71	-9	-13	-22
		EC 20/3	23	90	86	44	35	50	34	50	22	37	15	8
		EC 50/3	108	115	119	136	85	116	92	103	110	88	83	83
		EC 90/3	129	131	150	126	131	137	147	152	137	148	149	173
